# Supplementary material
Source: HighWire-hosted journal article supplement (https://drc.bmj.com/content/suppl/2020/12/16/8.2.e001795)
Supplement: bmjdrc-2020-001795supp001_data_supplement.pdf [file bmjdrc-2020-001795supp001_data_supplement.pdf]

Supplemental Figure 1

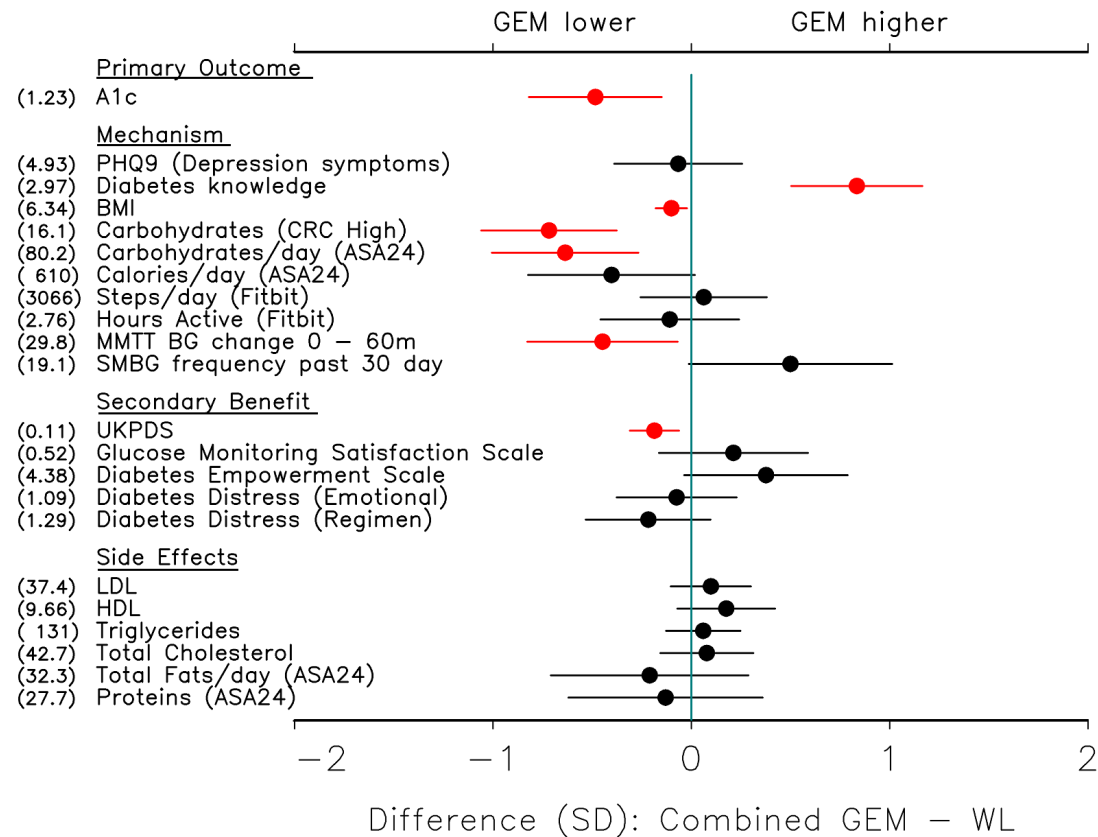

**Supplemental Figure 1.** Differences in mean outcomes, along with 95% confidence intervals, between the GEM and WL interventions. Points to the right of zero are outcomes that, on average, are greater for GEM than WL. Values to the left of 0 are, on average, lower for GEM than WL. Confidence intervals for outcomes that differ significantly ( $p < 0.05$ ) between the interventions are shown in red. In order for outcomes with different scales to be displayed on the same set of axes, the estimated between-group differences were divided by the baseline standard deviation (SD), shown in parentheses on the left. For example, dividing by the SD allows for differences in HbA1c (values between 5.5 and 13%) to be plotted on the same axis as daily steps (values in the thousands).

Supplemental Table 1. CONSORT 2010 Flow Diagram

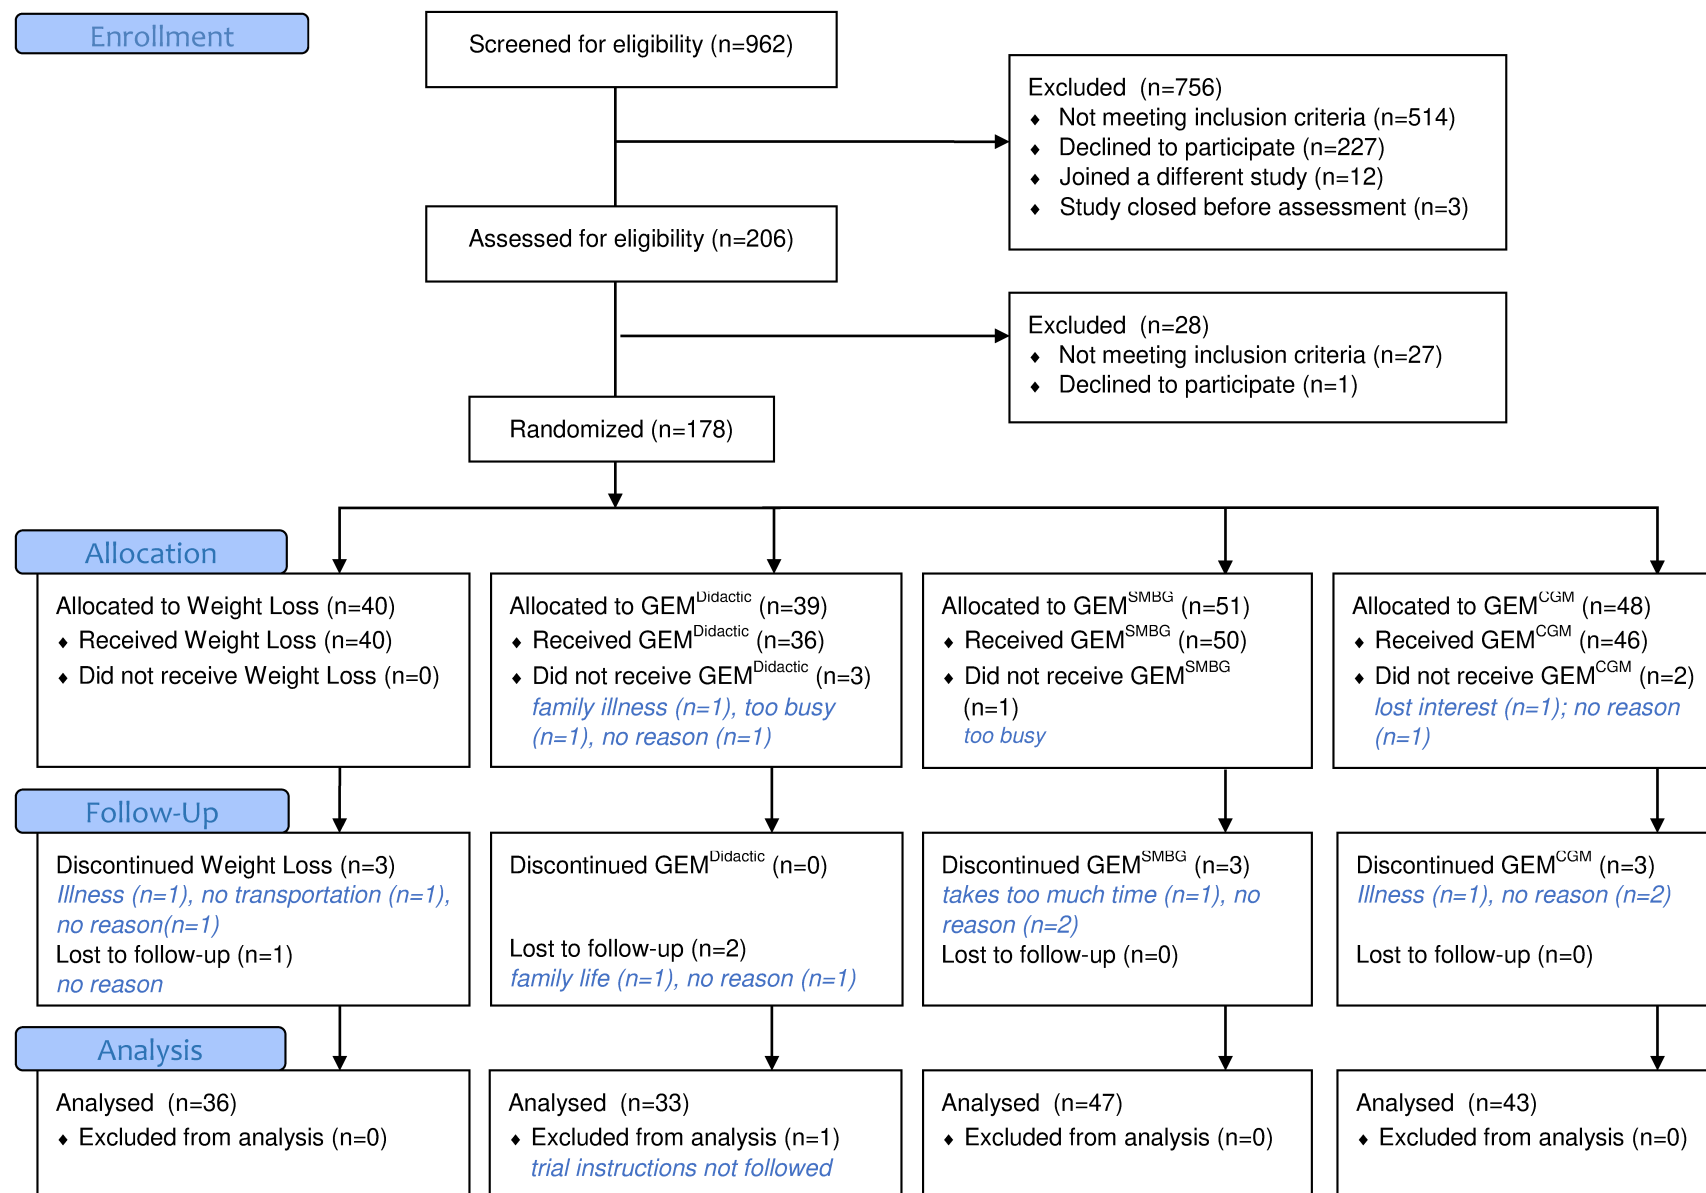

Supplemental Table 2. Pre- to follow-up-assessment change scores and F values for WL and GEM

|                                       | Estimate:<br>GEM -<br>WL | 95% CI             | F<br>GEM<br>vs WL | P<br>GEM vs<br>WL | Within<br>WL<br>Followup<br>-Pre<br>(n=36) | P<br>Within<br>WL | Within<br>GEM<br>Followu<br>p-Pre<br>(n=123) | P<br>Within<br>GEM |
|---------------------------------------|--------------------------|--------------------|-------------------|-------------------|--------------------------------------------|-------------------|----------------------------------------------|--------------------|
| <b>Primary Outcome Variable</b>       |                          |                    |                   |                   |                                            |                   |                                              |                    |
| HbA1c mean/SD change (%)              | -0.59                    | (-1.01, -0.18)     | 8.17              | 0.005             | -0.35                                      | 0.055             | -0.95                                        | < 0.001            |
| <b>Mechanism Variables</b>            |                          |                    |                   |                   |                                            |                   |                                              |                    |
| PHQ9 (Depression symptoms)            | -0.33                    | (-1.91, 1.26)      | 0.17              | 0.683             | -0.44                                      | 0.541             | -0.77                                        | 0.038              |
| Diabetes knowledge                    | 2.48                     | ( 1.49, 3.46)      | 24.83             | < 0.001           | 0.18                                       | 0.690             | 2.65                                         | < 0.001            |
| BMI                                   | -0.64                    | (-1.14, -0.14)     | 6.30              | 0.013             | -0.63                                      | 0.005             | -1.27                                        | < 0.001            |
| Carbohydrates (g) [CRC]               | -11.6                    | (-17.19, -6.1)     | 17.23             | < 0.001           | -4.88                                      | 0.050             | -16.45                                       | < 0.001            |
| Carbohydrates (g/day) [ASA24]         | -51.0                    | (-80.7, -21.4)     | 11.70             | 0.001             | -18.09                                     | 0.178             | -69.13                                       | < 0.001            |
| Calories/day (ASA24)                  | -245.38                  | (-501.94, 11.18)   | 3.60              | 0.061             | -35.82                                     | 0.756             | -281.21                                      | < 0.001            |
| Steps/day (Fitbit)                    | 191.90                   | (-784.41, 1168.21) | 0.15              | 0.698             | 393.90                                     | 0.368             | 585.80                                       | 0.012              |
| Hours Active (Fitbit)                 | -0.30                    | (-1.27, 0.66)      | 0.38              | 0.538             | 0.91                                       | 0.041             | 0.61                                         | 0.006              |
| ΔBG MMTT [0-60 min] (mmol/L)          | -0.7                     | (-1.4, -0.1)       | 5.48              | 0.021             | 0.5                                        | 0.082             | -0.3                                         | 0.090              |
| SMBG frequency past 30 day            | 9.54                     | (-0.24, 19.32)     | 3.71              | 0.056             | 6.40                                       | 0.143             | 15.94                                        | < 0.001            |
| <b>Secondary Benefit Variables</b>    |                          |                    |                   |                   |                                            |                   |                                              |                    |
| UKPDS (%)                             | -2                       | (-3, -1)           | 8.88              | 0.003             | -1                                         | 0.171             | -3                                           | < 0.001            |
| Glucose Monitoring Satisfaction Scale | 0.11                     | (-0.09, 0.31)      | 1.24              | 0.267             | 0.26                                       | 0.003             | 0.37                                         | < 0.001            |
| Diabetes Empowerment Scale            | 1.65                     | (-0.16, 3.45)      | 3.26              | 0.073             | 1.36                                       | 0.096             | 3.01                                         | < 0.001            |
| Diabetes Distress (Emotional)         | -0.08                    | (-0.41, 0.25)      | 0.23              | 0.629             | -0.15                                      | 0.303             | -0.23                                        | 0.002              |
| Diabetes Distress (Regimen)           | -0.28                    | (-0.69, 0.13)      | 1.86              | 0.175             | -0.33                                      | 0.078             | -0.61                                        | < 0.001            |
| <b>Side Effect Variables</b>          |                          |                    |                   |                   |                                            |                   |                                              |                    |
| LDL (mmol/L)                          | 0.20                     | (-0.21, 0.62)      | 0.93              | 0.335             | -0.15                                      | 0.427             | 0.06                                         | 0.579              |
| HDL (mmol/L)                          | 0.09                     | (-0.04, 0.23)      | 1.98              | 0.162             | 0.06                                       | 0.346             | 0.15                                         | < 0.001            |
| Triglycerides (mmol/L)                | 0.43                     | (-0.92, 1.79)      | 0.40              | 0.528             | -1.87                                      | 0.002             | -1.43                                        | < 0.001            |
| Total Cholesterol (mmol/L)            | 0.18                     | (-0.37, 0.74)      | 0.43              | 0.513             | -0.22                                      | 0.383             | -0.03                                        | 0.816              |
| Total Fats/day (g) [ASA24]            | -6.80                    | (-22.88, 9.28)     | 0.71              | 0.403             | 6.06                                       | 0.402             | -0.74                                        | 0.832              |
| Proteins (g) [ASA24]                  | -3.62                    | (-17.18, 9.94)     | 0.28              | 0.598             | 2.65                                       | 0.664             | -0.97                                        | 0.741              |

Supplemental Table 3. Comparison of the three GEM versions on primary and secondary outcome variables.

| Variables (Change)                    | GEM <sup>D</sup><br>Mean (SD) |         | GEM <sup>S</sup><br>Mean (SD) |         | GEM <sup>C</sup><br>Mean (SD) |         | P     |
|---------------------------------------|-------------------------------|---------|-------------------------------|---------|-------------------------------|---------|-------|
| <b>Primary Outcome Variable</b>       |                               |         |                               |         |                               |         |       |
| HbA1c (%)                             | -0.85                         | (1.54)  | -1.11                         | (1.08)  | -0.93                         | (0.96)  | 0.13  |
| <b>Mechanism Variables</b>            |                               |         |                               |         |                               |         |       |
| PHQ9 (Depression symptoms)            | -0.55                         | (4.11)  | 0.00                          | (4.42)  | -1.74                         | (5.13)  | 0.298 |
| Diabetes knowledge                    | 2.58                          | (2.61)  | 2.18                          | (2.70)  | 3.14                          | (2.44)  | 0.448 |
| BMI                                   | -1.33                         | (1.51)  | -1.32                         | (1.32)  | -1.16                         | (1.37)  | 0.844 |
| Carbohydrates (g) [CRC]               | -21.28                        | (23.83) | -14.17                        | (17.49) | -15.80                        | (14.06) | 0.785 |
| Total Carbohydrates (g/day) [ASA24]   | -85.70                        | (81.50) | -46.90                        | (70.00) | -67.50                        | (73.70) | 0.19  |
| Calories/day (ASA24)                  | -382                          | (575)   | -171                          | (572)   | -183                          | (616)   | 0.293 |
| Steps/day (Fitbit)                    | 1461                          | (3614)  | 250                           | (2320)  | 210                           | (2246)  | 0.1   |
| Hours Active (Fitbit)                 | 0.75                          | (2.71)  | 0.66                          | (2.41)  | 0.38                          | (1.94)  | 0.622 |
| ΔBG MMTT [0-60 min] (mmol/L)          | 0.09                          | (1.96)  | -0.40                         | (1.93)  | -0.30                         | (1.89)  | 0.922 |
| SMBG frequency past 30 day            | 1.21                          | (22.38) | 27.62                         | (34.99) | 21.30                         | (30.41) | 0.001 |
| <b>Secondary Benefit Variables</b>    |                               |         |                               |         |                               |         |       |
| UKPDS (%)                             | -2                            | (4)     | -3                            | (5)     | -4                            | (7)     | 0.431 |
| Glucose Monitoring Satisfaction Scale | 0.32                          | (0.52)  | 0.33                          | (0.57)  | 0.46                          | (0.57)  | 0.272 |
| Diabetes Empowerment Scale            | 2.70                          | (4.35)  | 3.30                          | (6.17)  | 3.24                          | (4.89)  | 0.824 |
| Diabetes Distress (Emotional)         | -0.27                         | (1.13)  | -0.03                         | (0.70)  | -0.44                         | (0.96)  | 0.344 |
| Diabetes Distress (Regimen)           | -0.74                         | (1.42)  | -0.43                         | (1.14)  | -0.67                         | (1.17)  | 0.817 |
| <b>Side Effect Variables</b>          |                               |         |                               |         |                               |         |       |
| LDL (mmol/L)                          | 0.03                          | (1.16)  | 0.10                          | (1.31)  | 0.08                          | (1.18)  | 0.792 |
| HDL (mmol/L)                          | 0.18                          | (0.33)  | 0.12                          | (0.25)  | 0.15                          | (0.46)  | 0.803 |
| Triglycerides (mmol/L)                | -0.93                         | (3.80)  | -1.19                         | (3.55)  | -2.95                         | (10.40) | 0.816 |
| Total Cholesterol (mmol/L)            | 0.10                          | (1.28)  | 0.09                          | (1.52)  | -0.30                         | (2.16)  | 0.617 |
| Total Fats/day (g) [ASA24]            | -2.29                         | (33.27) | 1.91                          | (35.34) | 5.43                          | (33.01) | 0.778 |
| Proteins (g) [ASA24]                  | -4.30                         | (23.63) | 0.72                          | (33.91) | 7.79                          | (29.89) | 0.305 |
